# Supplementary material for: Conditional iron and pH-dependent activity of a non-enzymatic glycolysis and pentose phosphate pathway
Source: PubMed Central journal article supplement — Sci Adv. 2016 Jan 15;2(1):e1501235. doi: 10.1126/sciadv.1501235 (PMC4730858; doi:10.1126/sciadv.1501235), 2016-01-15
Supplement: 1501235_SM.pdf [file 1501235_SM.pdf]

## Supplementary Materials for Conditional iron and pH-dependent activity of a non-enzymatic glycolysis and pentose phosphate pathway

Markus A. Keller, Andre Zylstra, Cecilia Castro, Alexandra V. Turchyn, Julian L. Griffin, Markus Ralser

Published 15 January 2016, *Sci. Adv.* **2**, e1501235 (2016)

DOI: 10.1126/sciadv.1501235

### This PDF file includes:

MS Table S1. MS/MS parameters.

MS Table S2. UPLC/HPLC parameters.

MS Table S3. HPLC gradient.

MS Table S4. Q1/Q3 (SRM) transitions and parameters.

Fig. S1. <sup>1</sup>H NMR spectra of R5P and Fe(II) mixtures.

Fig. S2. <sup>1</sup>H NMR spectra of R5P and Fe(III) mixtures.

Fig. S3. <sup>1</sup>H NMR spectra of 6PG and Fe(II) mixtures.

Fig. S4. <sup>1</sup>H NMR spectra of triethylamine and Fe(II) mixtures.

Table S2. *T*<sub>1</sub> relaxation time of R5P and Fe(III) mixtures.

Fig. S5. *T*<sub>1</sub> NMR experiment curve-fitting examples [example of 6PG and Fe(II)].

Fig. S6. Ferrozine results: Fe(II)/Fe(III) in dependence of pH.

Fig. S7. Enzymatic pH dependency of ribose-phosphate isomerase and comparison to its non-enzymatic counterpart (R5P→X5P/Ru5P).

Fig. S8. pH and iron dependency on non-enzymatic substrate consumption rates.

Fig. S9. Comparison of Fe(II)- and pH-facilitated non-enzymatic reactivity with the reaction network structure facilitated by a mixture of prebiotically plausible ocean metals [Keller *et al.* (19)].

Table S1. *T*<sub>1</sub> relaxation time of R5P and Fe(II) mixtures.

Table S3. *T*<sub>1</sub> relaxation time of 6PG and Fe(II) mixtures.

Table S4. *T*<sub>1</sub> relaxation time of triethylamine and Fe(II) mixtures.

Legend for table S5

Table S6. Maximum and minimum reaction rates of non-enzymatic interconversions between sugar phosphates in the presence of Fe(II).

Table S7. Maximum and minimum reaction rates of non-enzymatic interconversions between sugar phosphates in the absence of Fe(II).

Table S8. Relative acceleration of non-enzymatic interconversions between sugar phosphates by pH and iron availability and possible mechanistic rationale.

Legend for table S9

Text S1. Comparison of the reactions found here and in previous work [Keller *et al.* (19)] in which sediment-like complex metal mixtures were studied.

References (65–69)

**Other Supplementary Material for this manuscript includes the following:**

(available at [advances.sciencemag.org/cgi/content/full/2/1/e1501235/DC1](https://advances.sciencemag.org/cgi/content/full/2/1/e1501235/DC1))

Table S5 (.csv format). Integrated NMR peak areas for all individual iron–sugar phosphate interaction NMR experiments.

Table S9 (.csv format). Individual reaction rates of non-enzymatic interconversions between sugar phosphates in the presence and absence of Fe(II).

## Supplementary Figures and Tables

| MS Table S1. MS/MS Parameters |                                                    |
|-------------------------------|----------------------------------------------------|
| <b>Basic</b>                  |                                                    |
| Instrument                    | Triple Quadrupole mass spectrometer (Agilent 6460) |
| Software for analysis         | QQQ Quantitative analysis (Agilent)                |
| Scan Type                     | Multiple Reaction Monitoring (MRM)                 |
| Ion Source                    | ESI                                                |
| Ion Mode                      | ESI + Agilent Jet Stream                           |
| <b>Source Parameters</b>      |                                                    |
| Gas Temp (°C)                 | 300                                                |
| Gas Flow (l/min)              | 8                                                  |
| Nebulizer (psi)               | 50                                                 |
| Sheath Gas Flow               | 11                                                 |
| SheathGasHeater               | 300                                                |
| Negative Capillary (V)        | 3000                                               |
| Positive Capillary (V)        | 3500                                               |
| Nozzle voltage                | 500                                                |

| MS Table S2. UPLC/HPLC Parameters |                                                                 |
|-----------------------------------|-----------------------------------------------------------------|
| Instrument                        | On-Line coupled Agilent 1290                                    |
| Column                            | Zorbax Eclips Plus C8 Rapid Resolution 1.8 um, 2.1 x 50mm       |
| Column Temperature                | 25C                                                             |
| Flow rate                         | 0.6 ml/min                                                      |
| Solvent A                         | Water:AcCN 90:10 + 750 mg/l Octylammonium acetate               |
| Solvent B                         | Water:AcCN 50:50 + 750 mg/l Octylammonium acetate               |
| Needle wash                       | 15 sec AcCN:Water needle wash in flush port with each injection |

| MS Table S3. HPLC Gradient |             |             |           |
|----------------------------|-------------|-------------|-----------|
| Time                       | % solvent A | % solvent B | Flow rate |
| 0                          | 95          | 5           | 0.6       |
| 3.5                        | 95          | 5           | 0.6       |
| 6                          | 30          | 70          | 0.6       |
| 6.5                        | 20          | 80          | 0.6       |
| 6.7                        | 30          | 70          | 0.6       |
| 7                          | 95          | 5           | 0.6       |
| 7.5                        | 95          | 5           | 0.6       |

| MS Table S4. Q1/Q3 (SRM) transitions and parameters |              |                 |            |                 |        |              |          |
|-----------------------------------------------------|--------------|-----------------|------------|-----------------|--------|--------------|----------|
| Compound                                            | Prec Ion m/z | Product ion m/z | Dwell time | Fragment or (V) | CE (V) | Cell Acc (V) | Polarity |
| F16BP                                               | 339          | 97              | 40         | 175             | 16     | 7            | Negative |
| S7P                                                 | 289          | 97              | 40         | 100             | 12     | 7            | Negative |
| 6PG                                                 | 275          | 97              | 40         | 100             | 18     | 7            | Negative |
| G6P/F6P                                             | 259          | 97              | 40         | 100             | 12     | 7            | Negative |
| R5P/Ru5P/X5P                                        | 229          | 97              | 40         | 85              | 12     | 7            | Negative |
| E4P                                                 | 199          | 97              | 40         | 80              | 5      | 7            | Negative |
| 2PG/3PG                                             | 185          | 97              | 40         | 75              | 11     | 7            | Negative |
| Glu                                                 | 179          | 89              | 40         | 70              | 1      | 7            | Negative |
| G3P/DHAP                                            | 169          | 97              | 40         | 70              | 5      | 7            | Negative |
| PEP                                                 | 167          | 79              | 40         | 50              | 7      | 7            | Negative |
| Pyr                                                 | 87           | 43              | 40         | 55              | 3      | 7            | Negative |

Chromatographic separation allows identification and quantification of the following isomeric compounds: G6P and F6P; R5P and Ru5P/X5P; G3P and DHAP. MS1 resolution: Unit (0.7 m/z).

Supplementary Figure 1:  $^1\text{H}$  NMR spectra of R5P and Fe(II) mixtures.

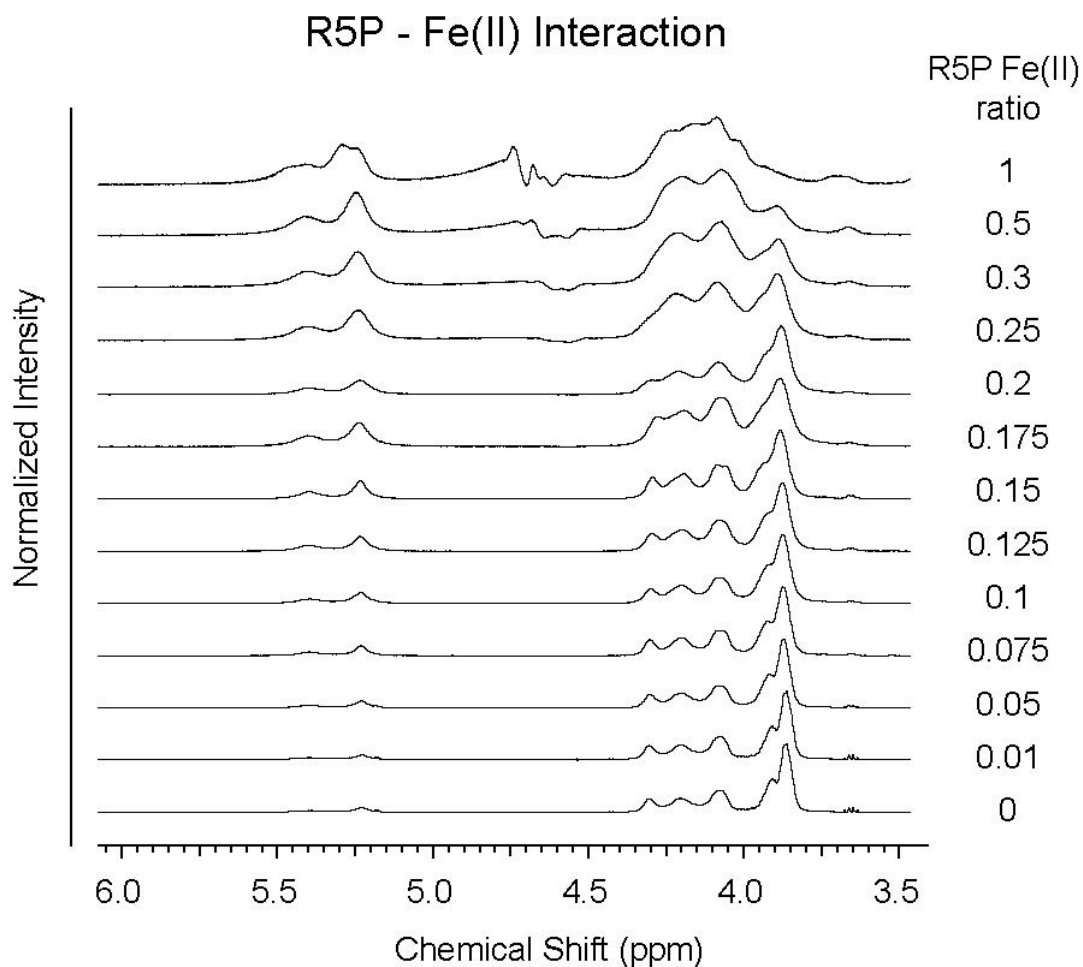

Supplementary Table 1:  $T_1$  relaxation time of R5P and Fe(II) mixtures

| Fe ratio | 5.39 ppm        | 5.22 ppm         | 4.30 ppm        | 4.20 ppm        | 4.08 ppm        | 3.91 ppm        | 3.85 ppm         |
|----------|-----------------|------------------|-----------------|-----------------|-----------------|-----------------|------------------|
| 0        | $5.60 \pm 0.20$ | $6.103 \pm 0.11$ | $3.07 \pm 0.19$ | $3.06 \pm 0.13$ | $2.93 \pm 0.31$ | $1.05 \pm 0.03$ | $1.07 \pm 0.004$ |
| 0.01     | $3.80 \pm 1.12$ | $5.01 \pm 0.45$  | $3.39 \pm 0.68$ | $3.19 \pm 0.48$ | $3.08 \pm 0.40$ | $1.08 \pm 0.13$ | $1.06 \pm 0.08$  |
| 0.05     | $4.09 \pm 0.63$ | $4.12 \pm 0.13$  | $2.30 \pm 1.04$ | $2.17 \pm 0.75$ | $2.18 \pm 0.59$ | $0.90 \pm 0.30$ | $0.85 \pm 0.15$  |
| 0.075    | $3.39 \pm 0.60$ | $3.55 \pm 0.32$  | $1.41 \pm 0.29$ | $1.44 \pm 0.20$ | $1.52 \pm 0.11$ | $0.53 \pm 0.05$ | $0.57 \pm 0.04$  |
| 0.1      | $2.37 \pm 0.39$ | $2.53 \pm 0.42$  | $1.18 \pm 0.26$ | $1.16 \pm 0.22$ | $1.19 \pm 0.27$ |                 | $0.45 \pm 0.15$  |
| 0.125    |                 | $1.17 \pm 0.28$  | $1.14 \pm 0.58$ | $0.98 \pm 0.39$ | $0.84 \pm 0.26$ |                 | $0.27 \pm 0.08$  |
| 0.15     | $1.49 \pm 0.54$ | $1.36 \pm 0.55$  | $0.99 \pm 0.58$ | $0.94 \pm 0.32$ | $0.87 \pm 0.23$ | $0.40 \pm 0.18$ | $0.32 \pm 0.06$  |
| 0.175    | $1.07 \pm 0.27$ | $1.01 \pm 0.30$  | $0.29 \pm 0.09$ | $0.31 \pm 0.12$ | $0.33 \pm 0.12$ | $0.10 \pm 0.02$ | $0.39 \pm 0.45$  |
| 0.2      | $0.62 \pm 0.03$ | $0.55 \pm 0.11$  | $0.47 \pm 0.40$ | $0.39 \pm 0.23$ | $0.33 \pm 0.14$ | $0.20 \pm 0.16$ | $0.10 \pm 0.04$  |
| 0.3      | $0.47 \pm 0.16$ | $0.51 \pm 0.07$  |                 | $0.49 \pm 0.27$ | $0.34 \pm 0.13$ |                 | $0.10 \pm 0.02$  |
| 0.4      |                 | $0.14 \pm 0.07$  |                 | $0.50 \pm 0.32$ | $0.32 \pm 0.17$ |                 | $0.09 \pm 0.04$  |
| 0.5      | $0.15 \pm 0.07$ | $0.18 \pm 0.04$  |                 | $0.13 \pm 0.06$ | $0.11 \pm 0.04$ |                 | $0.04 \pm 0.01$  |
| 1        | $0.11 \pm 0.08$ | $0.09 \pm 0.07$  |                 |                 |                 | $0.09 \pm 0.03$ |                  |

Supplementary Figure 2: <sup>1</sup>H NMR spectra of R5P and Fe(III) mixtures.

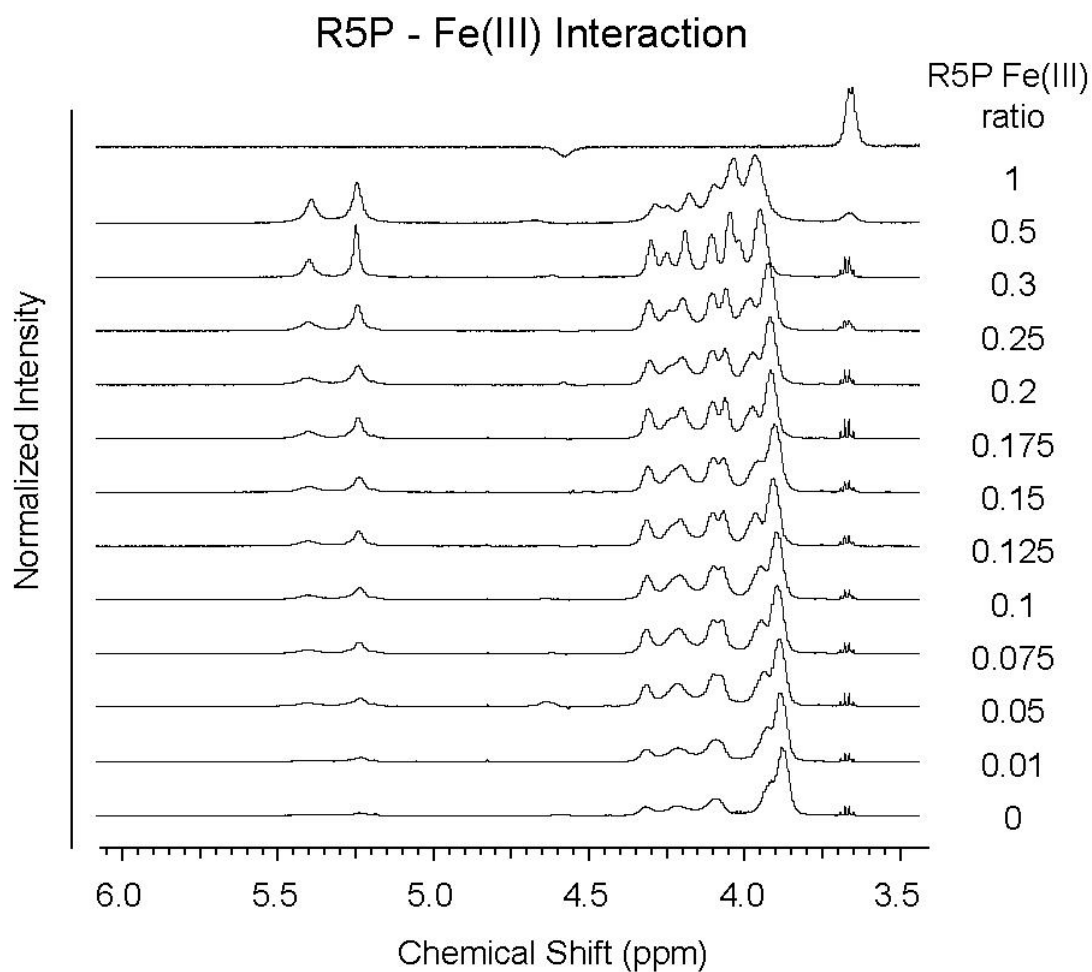

Supplementary Table 2: *T*<sub>1</sub> relaxation time of R5P and Fe(III) mixtures

| Fe ratio | 5.39 ppm    | 5.22 ppm    | 4.30 ppm    | 4.20 ppm    | 4.08 ppm    | 3.91 ppm    | 3.85 ppm    |
|----------|-------------|-------------|-------------|-------------|-------------|-------------|-------------|
| 0        | 5.47 ± 2.01 | 6.15 ± 1.26 | 3.93 ± 1.92 | 3.52 ± 0.89 | 3.39 ± 0.61 | 1.24 ± 0.34 | 1.14 ± 0.10 |
| 0.01     | 3.96 ± 0.68 | 4.22 ± 0.40 | 2.71 ± 0.63 | 2.37 ± 0.22 | 2.25 ± 0.14 | 1.02 ± 0.13 | 0.81 ± 0.08 |
| 0.05     | 3.52 ± 1.66 | 3.46 ± 1.38 | 1.31 ± 0.63 | 1.35 ± 0.28 | 1.38 ± 0.17 | 0.64 ± 0.12 | 0.55 ± 0.07 |
| 0.075    | 1.69 ± 0.65 | 1.96 ± 0.43 | 1.38 ± 0.38 | 1.25 ± 0.20 | 1.21 ± 0.11 | 0.50 ± 0.07 | 0.50 ± 0.04 |
| 0.1      | 1.71 ± 0.61 | 1.89 ± 0.41 | 1.06 ± 0.44 | 1.03 ± 0.24 | 1.02 ± 0.16 | 0.44 ± 0.08 | 0.43 ± 0.05 |
| 0.125    | 1.65 ± 0.11 | 1.73 ± 0.07 | 0.69 ± 0.12 | 0.79 ± 0.11 | 0.82 ± 0.10 | 0.34 ± 0.03 | 0.39 ± 0.05 |
| 0.15     | 1.56 ± 0.26 | 1.61 ± 0.23 | 0.84 ± 0.18 | 0.86 ± 0.14 | 0.86 ± 0.12 | 0.41 ± 0.07 | 0.39 ± 0.06 |
| 0.175    | 1.06 ± 0.05 | 1.18 ± 0.04 | 0.76 ± 0.12 | 0.73 ± 0.08 | 0.71 ± 0.07 | 0.31 ± 0.07 | 0.31 ± 0.03 |
| 0.2      | 0.92 ± 0.06 | 1.01 ± 0.03 | 0.74 ± 0.10 | 0.66 ± 0.07 | 0.64 ± 0.06 | 0.32 ± 0.06 | 0.26 ± 0.04 |
| 0.3      | 0.93 ± 0.22 | 1.02 ± 0.15 | 0.54 ± 0.07 | 0.61 ± 0.06 | 0.58 ± 0.07 | 0.29 ± 0.02 | 0.27 ± 0.02 |
| 0.4      | 0.79 ± 0.05 | 0.84 ± 0.03 | 0.42 ± 0.07 | 0.49 ± 0.02 | 0.42 ± 0.06 | 0.38 ± 0.02 | 0.23 ± 0.03 |
| 0.5      | 0.43 ± 0.10 | 0.72 ± 0.12 | 0.66 ± 0.06 | 0.63 ± 0.09 | 0.57 ± 0.08 | 0.49 ± 0.07 | 0.35 ± 0.03 |
| 1        |             |             |             |             |             |             |             |

Supplementary Figure 3:  $^1\text{H}$  NMR spectra of 6PG and Fe(II) mixtures.

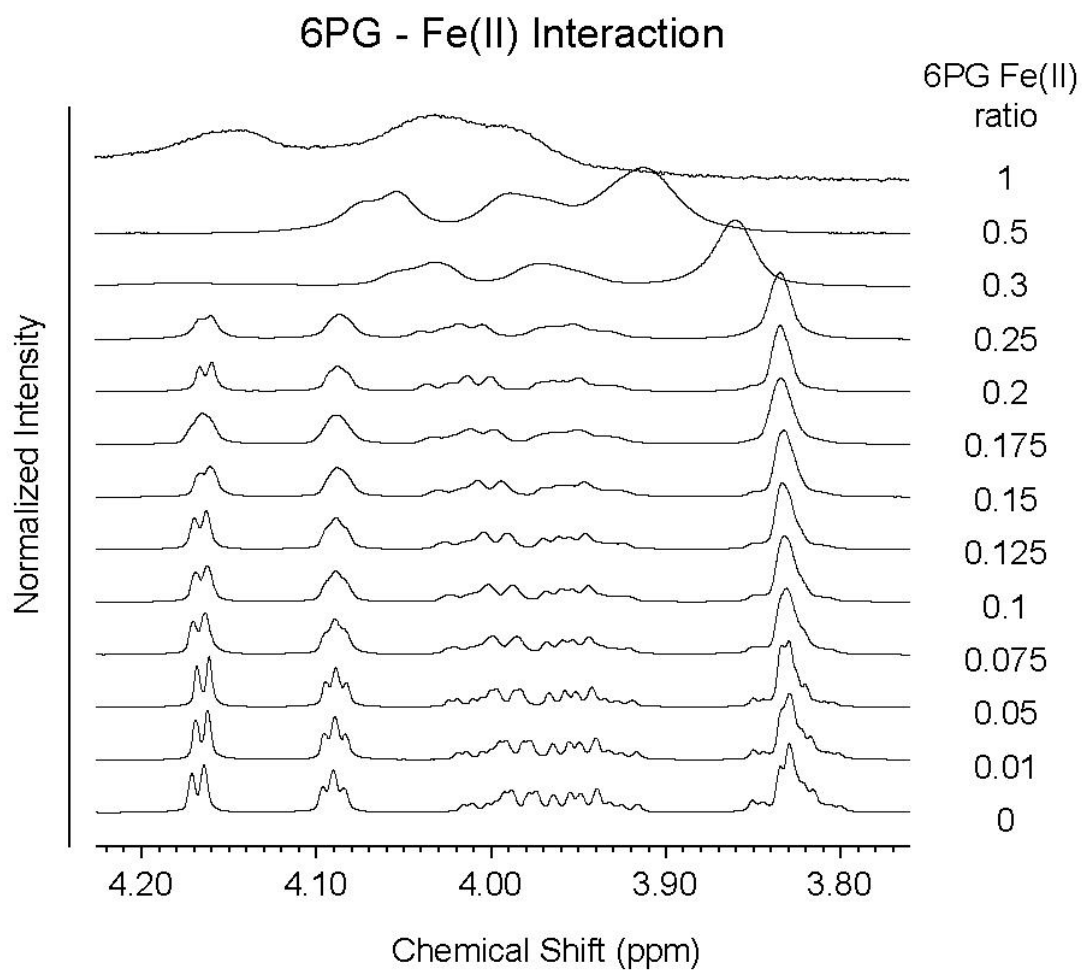

Supplementary Table 3:  $T_1$  relaxation time of 6PG and Fe(II) mixtures

| Fe ratio | 4.12 ppm (5)    | 4.09 ppm (1a)   | 3.96 ppm (4, 1b) | 3.84 ppm (2, 3) |
|----------|-----------------|-----------------|------------------|-----------------|
| 0        | $2.84 \pm 0.25$ | $2.45 \pm 0.21$ | $0.91 \pm 0.05$  | $2.12 \pm 0.04$ |
| 0.01     | $1.99 \pm 0.11$ | $1.78 \pm 0.1$  | $0.81 \pm 0.08$  | $1.55 \pm 0.05$ |
| 0.05     | $1.42 \pm 0.15$ | $1.34 \pm 0.1$  | $0.66 \pm 0.07$  | $1.22 \pm 0.06$ |
| 0.075    | $1.22 \pm 0.08$ | $1.13 \pm 0.18$ | $0.68 \pm 0.05$  | $1.16 \pm 0.01$ |
| 0.1      | $1.37 \pm 0.09$ | $1.32 \pm 0.06$ | $0.73 \pm 0.09$  | $1.16 \pm 0.03$ |
| 0.125    | $1.27 \pm 0.03$ | $1.23 \pm 0.03$ | $0.63 \pm 0.04$  | $1.12 \pm 0.01$ |
| 0.15     | $1 \pm 0.33$    | $1.01 \pm 0.28$ | $0.56 \pm 0.19$  | $0.84 \pm 0.38$ |
| 0.175    | $1.1 \pm 0.07$  | $1.68 \pm 0.94$ | $0.51 \pm 0.19$  | $0.85 \pm 0.29$ |
| 0.2      | $1.07 \pm 0.13$ | $1.14 \pm 0.08$ | $0.61 \pm 0.07$  | $0.95 \pm 0.11$ |
| 0.3      | $0.44 \pm 0.24$ | $0.66 \pm 0.14$ | $0.35 \pm 0.09$  | $0.43 \pm 0.09$ |
| 0.4      |                 |                 | $0.24 \pm 0.27$  | $0.33 \pm 0.37$ |
| 0.5      |                 |                 | $0.13 \pm 0.05$  | $0.13 \pm 0.02$ |
| 1        |                 |                 |                  |                 |

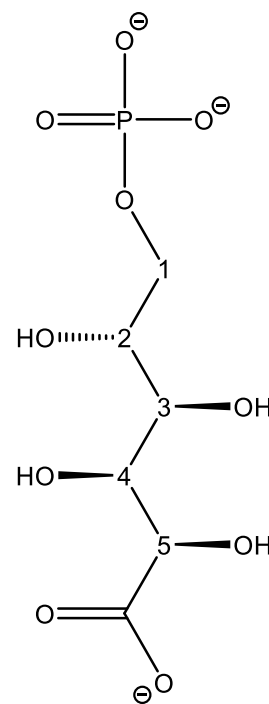

Supplementary Figure 4:  $^1\text{H}$  NMR spectra of triethylamine and Fe(II) mixtures.

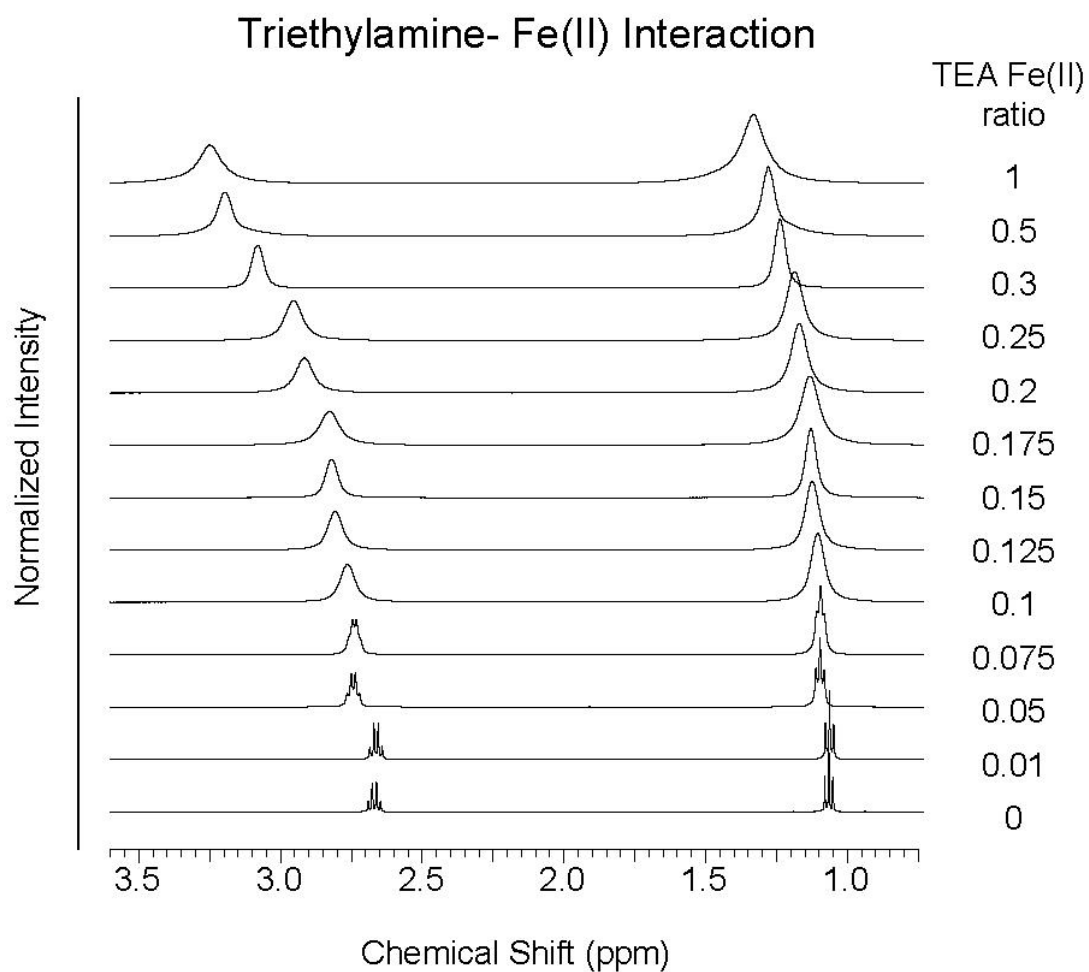

Supplementary Table 4:  $T_1$  relaxation time of triethylamine and Fe(II) mixtures

| Fe ratio | 1.06ppm (1)     | 2.67ppm (2)     |
|----------|-----------------|-----------------|
| 0        | $3.54 \pm 0.02$ | $3.04 \pm 0.06$ |
| 0.01     | $3.27 \pm 0.05$ | $2.81 \pm 0.05$ |
| 0.05     | $2.92 \pm 0.05$ | $2.56 \pm 0.04$ |
| 0.075    | $1.77 \pm 0.66$ | $1.78 \pm 0.77$ |
| 0.1      | $1.60 \pm 0.42$ | $1.47 \pm 0.32$ |
| 0.125    | $1.38 \pm 0.11$ | $1.38 \pm 0.26$ |
| 0.15     | $2.50 \pm 0.08$ | $2.32 \pm 0.20$ |
| 0.175    | $1.63 \pm 0.25$ | $1.64 \pm 0.43$ |
| 0.2      | $2.06 \pm 0.52$ | $1.86 \pm 0.44$ |
| 0.3      | $1.58 \pm 0.20$ | $1.47 \pm 0.21$ |
| 0.4      | $3.60 \pm 0.10$ | $3.17 \pm 0.13$ |
| 0.5      | $4.30 \pm 0.11$ | $3.75 \pm 0.13$ |
| 1        | $3.69 \pm 0.43$ | $2.95 \pm 0.97$ |

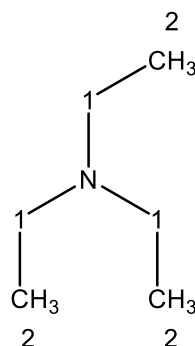

Supplementary Table 5: **Integrated NMR peak areas for all individual iron–sugar phosphate interaction NMR experiments**

See Supplemental Table\_integrated\_NMR\_peaks.csv

Supplementary Figure 5:  $T_1$  NMR experiment curve-fitting examples [example of 6PG and Fe(II)]

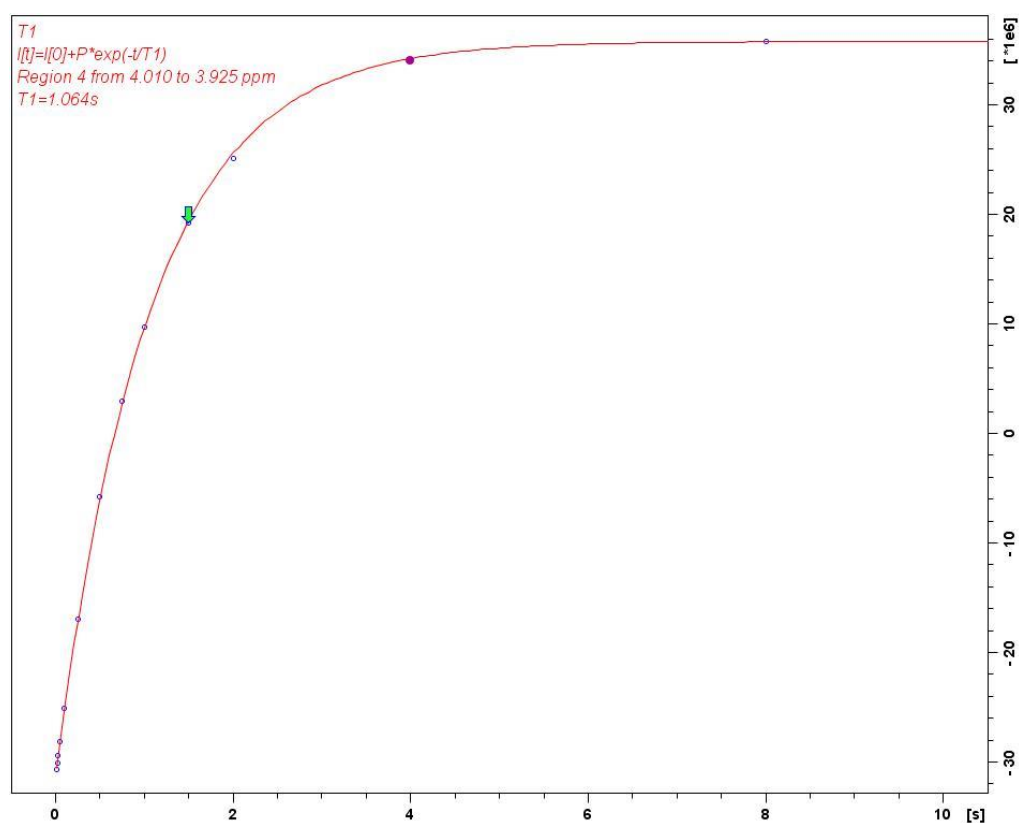

Recorded data of  $T_1$  NMR experiments was fitted as described in materials and methods. As an representative example we show here a curve fitting result for a sample containing 20 mM 6PG and 3 mM Fe(II).



Supplementary Figure 6: **Ferrozine results: Fe(II)/Fe(III) in dependence of pH**

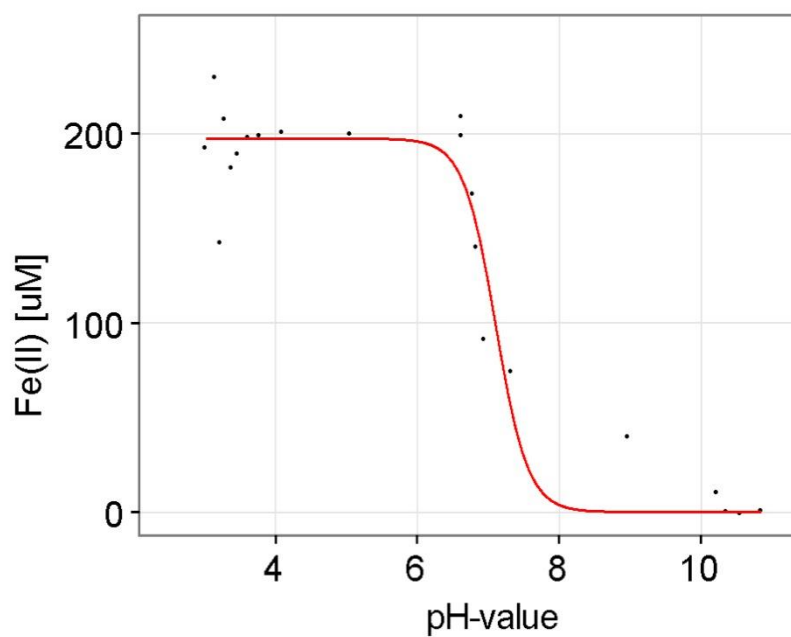

Fe(II) availability in dependence of pH was measured with ferrozine assay (see material and methods). pH of a 200 μM Fe(II)Cl<sub>2</sub> solution was adjusted with 0.1 M HCl or 0.1 M KOH, ionic strength was compensated with the respective amount of 0.1 M KCl. Photospectrometric data was quantified with an external calibration curve and fitted with a logistic model.

Supplementary Figure 7: **Enzymatic pH dependency of ribose-phosphate isomerase and comparison to its non-enzymatic counterpart (R5P→X5P/Ru5P)**

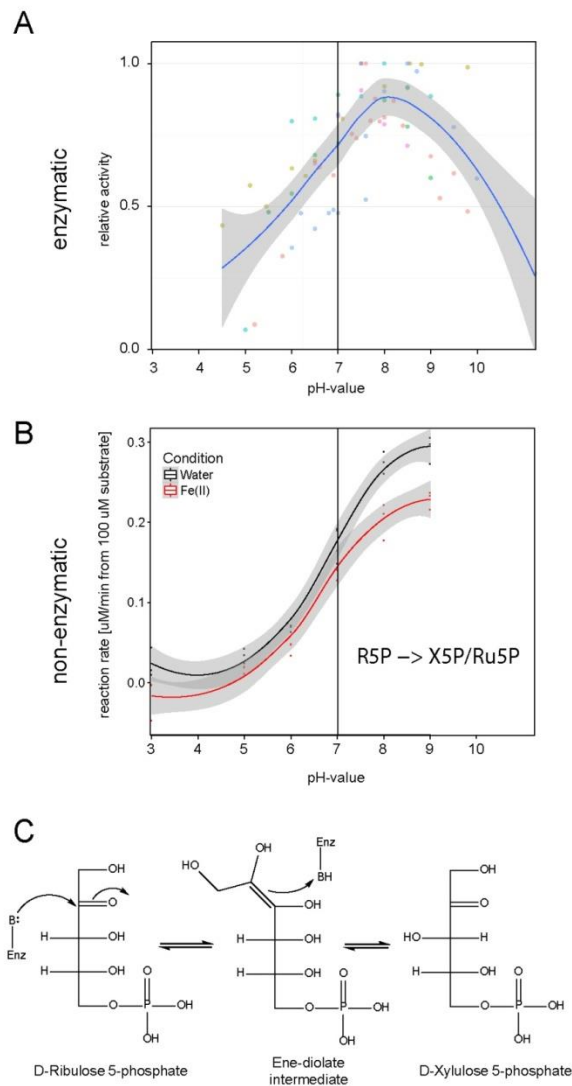

- A) pH optimum of Ribose phosphate isomerase. pH-dependent enzymatic activity profiles were extracted from published sources (65–69) and normalized to the respective highest activity value. All data was combined to a consensus profile and fitted with a Loess model. The optimum activity for the enzymatic reaction was found between pH 8 and 9.
- B) Non-enzymatic pH dependence profile in the pH-range from 3-9 for the non-enzymatic reactions is depicted in analogy to Figure 3, lower left panel in the main figure. Highest non-enzymatic reactivity was observed at pH 8 to 9.
- C) Suggested reversible reaction mechanism of ribose phosphate isomerase as (replicated from 6) requires bases catalysed deprotonation of ribose 5-phosphate to then form a ene-diolate intermediate that is subsequently further converted into xylulose 5-phosphate.

Supplementary Figure 8: **pH and iron dependency on non-enzymatic substrate consumption rates**

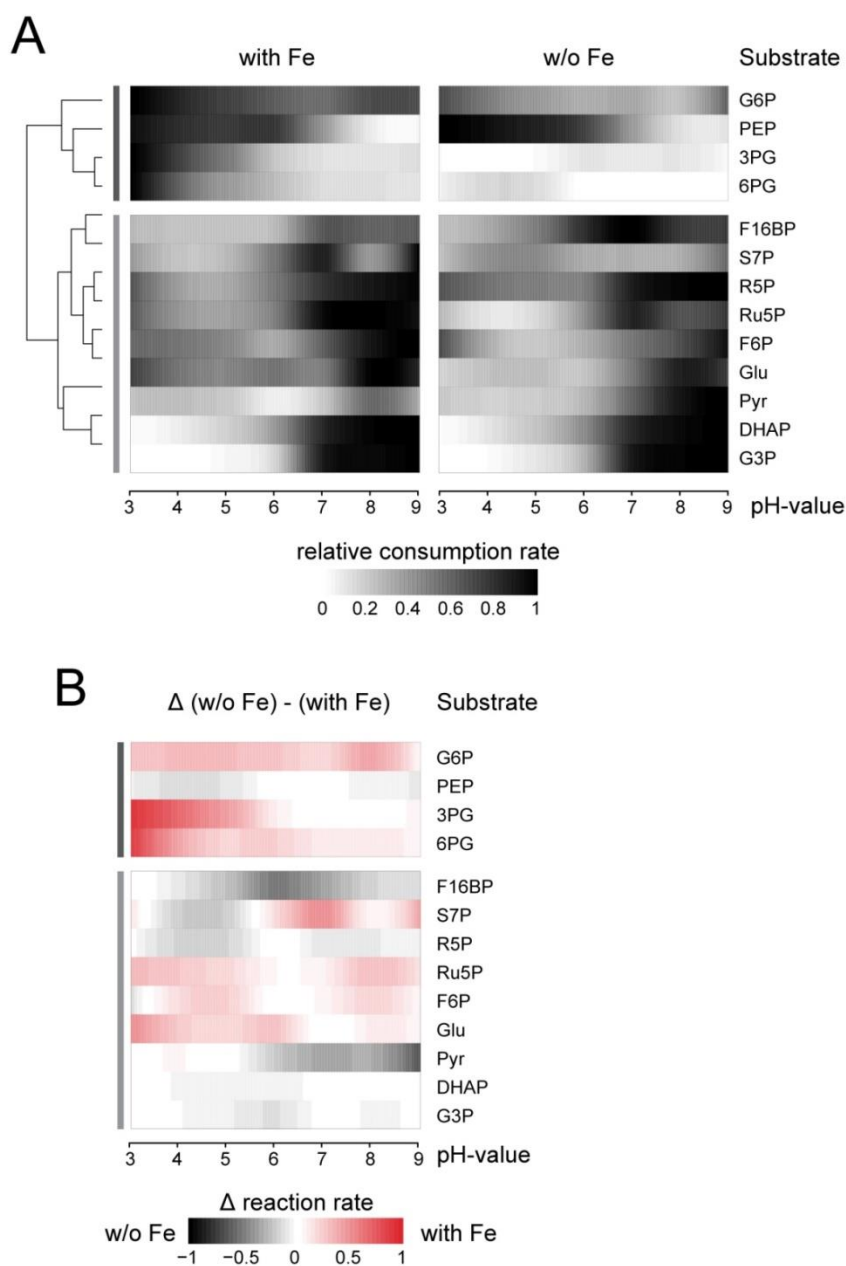

- A) pH-dependent changes expressed as relative reaction rates for individual non-enzymatic consumption rates of substrates, generated by fitting a Loess model to the experimental data and are normalized to the highest rate found in the presence of iron (left panel) or iron-free (right panel) conditions, as function of pH. Hierarchical clustering on Fe(II) profiles separated the reactions into two groups: Those accelerated in i) acidic or ii) alkaline conditions.
- B) Differences in non-enzymatic substrate consumption rates between iron-rich and iron free conditions ( $\Delta R$ ). Red indicates higher rates in an iron-rich environment, whereas black shows higher reactivity when no iron is present.

Supplementary Table 6: Maximum and minimum reaction rates of non-enzymatic interconversions between sugar phosphates in the presence of Fe(II)

| Nr | Reaction     | Substrate | Product | Condition | Maximum rate [uM/min from 100 uM substrate] |          |     | Minimum rate [uM/min from 100 uM substrate] |          |     |
|----|--------------|-----------|---------|-----------|---------------------------------------------|----------|-----|---------------------------------------------|----------|-----|
|    |              |           |         |           | Mean                                        | SD       | pH  | Mean                                        | SD       | pH  |
| 1  | 3PG->Pyr     | 3PG       | Pyr     | Fe        | 2.85E-04                                    | 1.24E-04 | 3.0 | 2.56E-05                                    | 4.43E-05 | 7.0 |
| 2  | 6PG->E4P     | 6PG       | E4P     | Fe        | 1.26E-01                                    | 9.76E-03 | 9.0 | 5.94E-03                                    | 4.26E-04 | 3.0 |
| 3  | 6PG->Pyr     | 6PG       | Pyr     | Fe        | 9.69E-03                                    | 2.95E-03 | 5.0 | 1.51E-03                                    | 3.47E-04 | 3.0 |
| 4  | 6PG->R5P     | 6PG       | R5P     | Fe        | 1.37E-01                                    | 1.21E-02 | 3.0 | 1.09E-02                                    | 4.69E-03 | 7.0 |
| 5  | 6PG->X5PRu5P | 6PG       | X5PRu5P | Fe        | 9.21E-03                                    | 1.27E-03 | 3.0 | 2.30E-03                                    | 1.99E-04 | 8.0 |
| 6  | DHAP->Pyr    | DHAP      | Pyr     | Fe        | 2.59E-02                                    | 9.76E-03 | 8.0 | 1.39E-03                                    | 2.14E-04 | 5.0 |
| 7  | F16BP->E4P   | F16BP     | E4P     | Fe        | 4.41E-01                                    | 2.06E-02 | 8.0 | 1.43E-02                                    | 3.67E-03 | 3.0 |
| 8  | F16BP->F6P   | F16BP     | F6P     | Fe        | 4.02E-03                                    | 3.63E-04 | 3.0 | 4.38E-05                                    | 7.59E-05 | 9.0 |
| 9  | F16BP->Glu   | F16BP     | Glu     | Fe        | 4.30E-03                                    | 2.48E-03 | 5.0 | 0.00E+00                                    | 0.00E+00 | 6.0 |
| 10 | F16BP->Pyr   | F16BP     | Pyr     | Fe        | 1.28E-02                                    | 3.16E-05 | 7.0 | 6.77E-03                                    | 2.81E-03 | 3.0 |
| 11 | F6P->G6P     | F6P       | G6P     | Fe        | 1.91E-02                                    | 5.99E-03 | 9.0 | 1.24E-03                                    | 4.74E-04 | 3.0 |
| 12 | F6P->Glu     | F6P       | Glu     | Fe        | 7.34E-04                                    | 3.61E-04 | 3.0 | 1.94E-04                                    | 1.86E-04 | 8.0 |
| 13 | F6P->Pyr     | F6P       | Pyr     | Fe        | 1.26E-03                                    | 1.87E-04 | 3.0 | 6.13E-04                                    | 6.94E-04 | 8.0 |
| 14 | F6P->R5P     | F6P       | R5P     | Fe        | 2.03E-04                                    | 1.50E-04 | 9.0 | 4.50E-06                                    | 7.79E-06 | 5.0 |
| 15 | F6P->X5PRu5P | F6P       | X5PRu5P | Fe        | 3.70E-04                                    | 1.10E-04 | 9.0 | 1.70E-05                                    | 1.35E-05 | 5.0 |
| 16 | G3P->Pyr     | G3P       | Pyr     | Fe        | 8.98E-03                                    | 2.83E-03 | 8.0 | 8.53E-04                                    | 2.03E-04 | 3.0 |
| 17 | G6P->Glu     | G6P       | Glu     | Fe        | 4.79E-03                                    | 1.23E-03 | 6.0 | 0.00E+00                                    | 0.00E+00 | 7.0 |
| 18 | G6P->Pyr     | G6P       | Pyr     | Fe        | 8.57E-04                                    | 7.87E-04 | 5.0 | 2.39E-04                                    | 1.59E-04 | 9.0 |
| 19 | PEP->Pyr     | PEP       | Pyr     | Fe        | 2.09E-01                                    | 8.06E-03 | 3.0 | 1.17E-03                                    | 4.22E-04 | 9.0 |
| 20 | R5P->E4P     | R5P       | E4P     | Fe        | 5.29E-02                                    | 3.12E-03 | 9.0 | 7.67E-04                                    | 1.21E-03 | 3.0 |
| 21 | R5P->Pyr     | R5P       | Pyr     | Fe        | 7.23E-03                                    | 1.51E-03 | 7.0 | 3.53E-03                                    | 2.31E-04 | 5.0 |
| 22 | R5P->X5PRu5P | R5P       | X5PRu5P | Fe        | 2.30E-01                                    | 1.10E-02 | 9.0 | 0.00E+00                                    | 0.00E+00 | 3.0 |
| 23 | Ru5P->Pyr    | Ru5P      | Pyr     | Fe        | 1.41E-02                                    | 1.08E-03 | 3.0 | 8.90E-03                                    | 9.49E-04 | 6.0 |
| 24 | Ru5P->R5P    | Ru5P      | R5P     | Fe        | 2.34E-01                                    | 2.13E-02 | 8.0 | 4.32E-03                                    | 1.97E-03 | 3.0 |
| 25 | S7P->Pyr     | S7P       | Pyr     | Fe        | 5.59E-04                                    | 4.03E-05 | 5.0 | 2.34E-04                                    | 1.12E-04 | 9.0 |
| 26 | S7P->R5P     | S7P       | R5P     | Fe        | 1.90E-03                                    | 1.21E-03 | 5.0 | 0.00E+00                                    | 0.00E+00 | 9.0 |

Supplementary Table 7: Maximum and minimum reaction rates of non-enzymatic interconversions between sugar phosphates in the absence of Fe(II)

| Nr | Reaction     | Substrate | Product | Condition | Maximum rate [uM/min from 100 uM substrate] |          |     | Minimum rate [uM/min from 100 uM substrate] |          |     |
|----|--------------|-----------|---------|-----------|---------------------------------------------|----------|-----|---------------------------------------------|----------|-----|
|    |              |           |         |           | Mean                                        | SD       | pH  | Mean                                        | SD       | pH  |
| 1  | 3PG->Pyr     | 3PG       | Pyr     | AD        | 2.14E-05                                    | 1.86E-05 | 3.0 | 5.63E-06                                    | 9.76E-06 | 9.0 |
| 2  | 6PG->E4P     | 6PG       | E4P     | AD        | 3.38E-03                                    | 2.84E-03 | 9.0 | 2.40E-04                                    | 3.15E-04 | 5.0 |
| 3  | 6PG->Pyr     | 6PG       | Pyr     | AD        | 1.62E-04                                    | 9.87E-05 | 6.0 | 0.00E+00                                    | 0.00E+00 | 5.0 |
| 4  | 6PG->R5P     | 6PG       | R5P     | AD        | 0.00E+00                                    | 0.00E+00 | 8.0 | 0.00E+00                                    | 0.00E+00 | 9.0 |
| 5  | 6PG->X5PRu5P | 6PG       | X5PRu5P | AD        | 2.20E-04                                    | 1.90E-04 | 6.0 | 0.00E+00                                    | 0.00E+00 | 5.0 |
| 6  | DHAP->Pyr    | DHAP      | Pyr     | AD        | 3.89E-03                                    | 1.30E-03 | 7.0 | 3.88E-04                                    | 3.12E-04 | 3.0 |
| 7  | F16BP->E4P   | F16BP     | E4P     | AD        | 8.12E-03                                    | 5.96E-04 | 6.0 | 1.95E-03                                    | 2.50E-04 | 9.0 |
| 8  | F16BP->F6P   | F16BP     | F6P     | AD        | 5.56E-03                                    | 1.62E-04 | 3.0 | 0.00E+00                                    | 0.00E+00 | 9.0 |
| 9  | F16BP->Glu   | F16BP     | Glu     | AD        | 1.21E-03                                    | 2.09E-03 | 6.0 | 0.00E+00                                    | 0.00E+00 | 3.0 |
| 10 | F16BP->Pyr   | F16BP     | Pyr     | AD        | 9.31E-03                                    | 1.38E-03 | 7.0 | 1.64E-03                                    | 2.81E-04 | 3.0 |
| 11 | F6P->G6P     | F6P       | G6P     | AD        | 2.61E-02                                    | 1.02E-02 | 9.0 | 1.11E-03                                    | 6.75E-04 | 3.0 |
| 12 | F6P->Glu     | F6P       | Glu     | AD        | 8.00E-04                                    | 4.98E-04 | 5.0 | 3.88E-04                                    | 2.05E-04 | 8.0 |
| 13 | F6P->Pyr     | F6P       | Pyr     | AD        | 4.23E-04                                    | 1.92E-04 | 5.0 | 1.77E-05                                    | 3.06E-05 | 7.0 |
| 14 | F6P->R5P     | F6P       | R5P     | AD        | 4.98E-05                                    | 7.44E-05 | 8.0 | 6.13E-06                                    | 1.06E-05 | 7.0 |
| 15 | F6P->X5PRu5P | F6P       | X5PRu5P | AD        | 1.10E-04                                    | 1.15E-05 | 9.0 | 1.97E-05                                    | 3.42E-05 | 3.0 |
| 16 | G3P->Pyr     | G3P       | Pyr     | AD        | 9.57E-03                                    | 5.95E-04 | 9.0 | 1.79E-04                                    | 3.48E-05 | 3.0 |
| 17 | G6P->Glu     | G6P       | Glu     | AD        | 2.36E-03                                    | 5.36E-04 | 3.0 | 0.00E+00                                    | 0.00E+00 | 6.0 |
| 18 | G6P->Pyr     | G6P       | Pyr     | AD        | 3.61E-04                                    | 2.30E-04 | 3.0 | 5.66E-05                                    | 2.95E-05 | 7.0 |
| 19 | PEP->Pyr     | PEP       | Pyr     | AD        | 1.93E-01                                    | 8.17E-03 | 3.0 | 7.23E-04                                    | 1.89E-04 | 9.0 |
| 20 | R5P->E4P     | R5P       | E4P     | AD        | 5.59E-03                                    | 4.10E-03 | 7.0 | 8.94E-04                                    | 5.50E-04 | 3.0 |
| 21 | R5P->Pyr     | R5P       | Pyr     | AD        | 2.97E-03                                    | 6.65E-04 | 7.0 | 1.33E-03                                    | 8.56E-05 | 9.0 |
| 22 | R5P->X5PRu5P | R5P       | X5PRu5P | AD        | 2.93E-01                                    | 1.71E-02 | 9.0 | 2.74E-02                                    | 1.25E-02 | 3.0 |
| 23 | Ru5P->Pyr    | Ru5P      | Pyr     | AD        | 4.24E-03                                    | 8.38E-04 | 5.0 | 1.06E-04                                    | 7.14E-06 | 9.0 |
| 24 | Ru5P->R5P    | Ru5P      | R5P     | Fe        | 2.62E-01                                    | 4.65E-02 | 8.0 | 2.50E-02                                    | 6.86E-03 | 3.0 |
| 25 | S7P->Pyr     | S7P       | Pyr     | Fe        | 5.67E-04                                    | 7.26E-04 | 7.0 | 6.18E-06                                    | 1.07E-05 | 8.0 |
| 26 | S7P->R5P     | S7P       | R5P     | Fe        | 2.41E-03                                    | 8.04E-04 | 6.0 | 0.00E+00                                    | 0.00E+00 | 9.0 |

Supplementary Table 8: **Relative acceleration of non-enzymatic interconversions between sugar phosphates by pH and iron availability and possible mechanistic rationale.**

| Nr | Reaction     | Substrate | Product | Fe dep. | Fe Max/min | AD max/min | Fe max /AD max | Possible reaction mechanism |
|----|--------------|-----------|---------|---------|------------|------------|----------------|-----------------------------|
| 1  | 3PG->Pyr     | 3PG       | Pyr     | yes     | 11.1       | 3.8        | 13.3           | complex multistep           |
| 2  | 6PG->E4P     | 6PG       | E4P     | yes     | 21.2       | 14.1       | 37.3           | combination of 4 and 20     |
| 3  | 6PG->Pyr     | 6PG       | Pyr     | yes     | 6.4        | inf        | 59.8           | complex multistep           |
| 4  | 6PG->R5P     | 6PG       | R5P     | yes     | 12.6       | inf        | inf            | decarboxylation+isomerisat. |
| 5  | 6PG->X5PRu5P | 6PG       | X5PRu5P | yes     | 4.0        | inf        | 41.9           | decarboxylation             |
| 6  | DHAP->Pyr    | DHAP      | Pyr     | yes     | 18.6       | 10.0       | 6.7            | complex multistep           |
| 7  | F16BP->E4P   | F16BP     | E4P     | yes     | 30.8       | 4.2        | 54.3           | C-C bond breakage           |
| 8  | F16BP->F6P   | F16BP     | F6P     |         | 91.7       | inf        | 0.7            | dephosphorylation           |
| 9  | F16BP->Glu   | F16BP     | Glu     | Yes     | inf        | inf        | 3.6            | dephosphorylation           |
| 10 | F16BP->Pyr   | F16BP     | Pyr     |         | 1.9        | 5.7        | 1.4            | complex multistep           |
| 11 | F6P->G6P     | F6P       | G6P     |         | 15.4       | 23.5       | 0.7            | isomerisation               |
| 12 | F6P->Glu     | F6P       | Glu     |         | 3.8        | 2.1        | 0.9            | dephosphorylation           |
| 13 | F6P->Pyr     | F6P       | Pyr     | yes     | 2.1        | 23.9       | 3.0            | complex multistep           |
| 14 | F6P->R5P     | F6P       | R5P     | Yes     | 45.1       | 8.1        | 4.1            | dephosphorylation           |
| 15 | F6P->X5PRu5P | F6P       | X5PRu5P | Yes     | 21.7       | 5.6        | 3.4            | C-C bond breakage           |
| 16 | G3P->Pyr     | G3P       | Pyr     |         | 10.5       | 53.3       | 0.9            | complex multistep           |
| 17 | G6P->Glu     | G6P       | Glu     |         | inf        | inf        | 2.0            | dephosphorylation           |
| 18 | G6P->Pyr     | G6P       | Pyr     | Yes     | 3.6        | 6.4        | 2.4            | complex multistep           |
| 19 | PEP->Pyr     | PEP       | Pyr     |         | 178.6      | 266.8      | 1.1            | dephosphorylation           |
| 20 | R5P->E4P     | R5P       | E4P     | Yes     | 69.0       | 6.2        | 9.5            | C-C bond breakage           |
| 21 | R5P->Pyr     | R5P       | Pyr     | Yes     | 2.0        | 2.2        | 2.4            | complex multistep           |
| 22 | R5P->X5PRu5P | R5P       | X5PRu5P |         | inf        | 10.7       | 0.8            | isomerisation               |
| 23 | Ru5P->Pyr    | Ru5P      | Pyr     | Yes     | 1.6        | 40.0       | 3.3            | complex multistep           |
| 24 | Ru5P->R5P    | Ru5P      | R5P     |         | 54.2       | 10.5       | 0.9            | isomerisation               |
| 25 | S7P->Pyr     | S7P       | Pyr     |         | 2.4        | 91.7       | 1.0            | complex multistep           |
| 26 | S7P->R5P     | S7P       | R5P     |         | inf        | inf        | 0.8            | C-C bond breakage           |

**Supplementary Table 9: Individual reaction rates of non-enzymatic interconversions between sugar phosphates in the presence and absence of Fe(II)**

**See Supplemental Table\_all\_rates.csv**

**Supplementary Text 1: Comparison of the reactions found here and in previous work [Keller *et al.* (19)] in which sediment-like complex metal mixtures were studied**

When comparing the observed reactions in this study with our previous results (19), it is important to take several important experimental differences into account: (i) The reactivity we report here is purely based on the action of the Fe(II) component whereas a more complex Archean ocean reconstruction that oriented on early sediments were tested earlier. (ii) Another difference is that in this study the experimental evaluation under absence of Fe(II) (water conditions) was performed in an anoxic environment. (iii) Furthermore, instead of a slightly acidic environment (see above) a broad range of different pH conditions using a phosphate buffer system were tested.

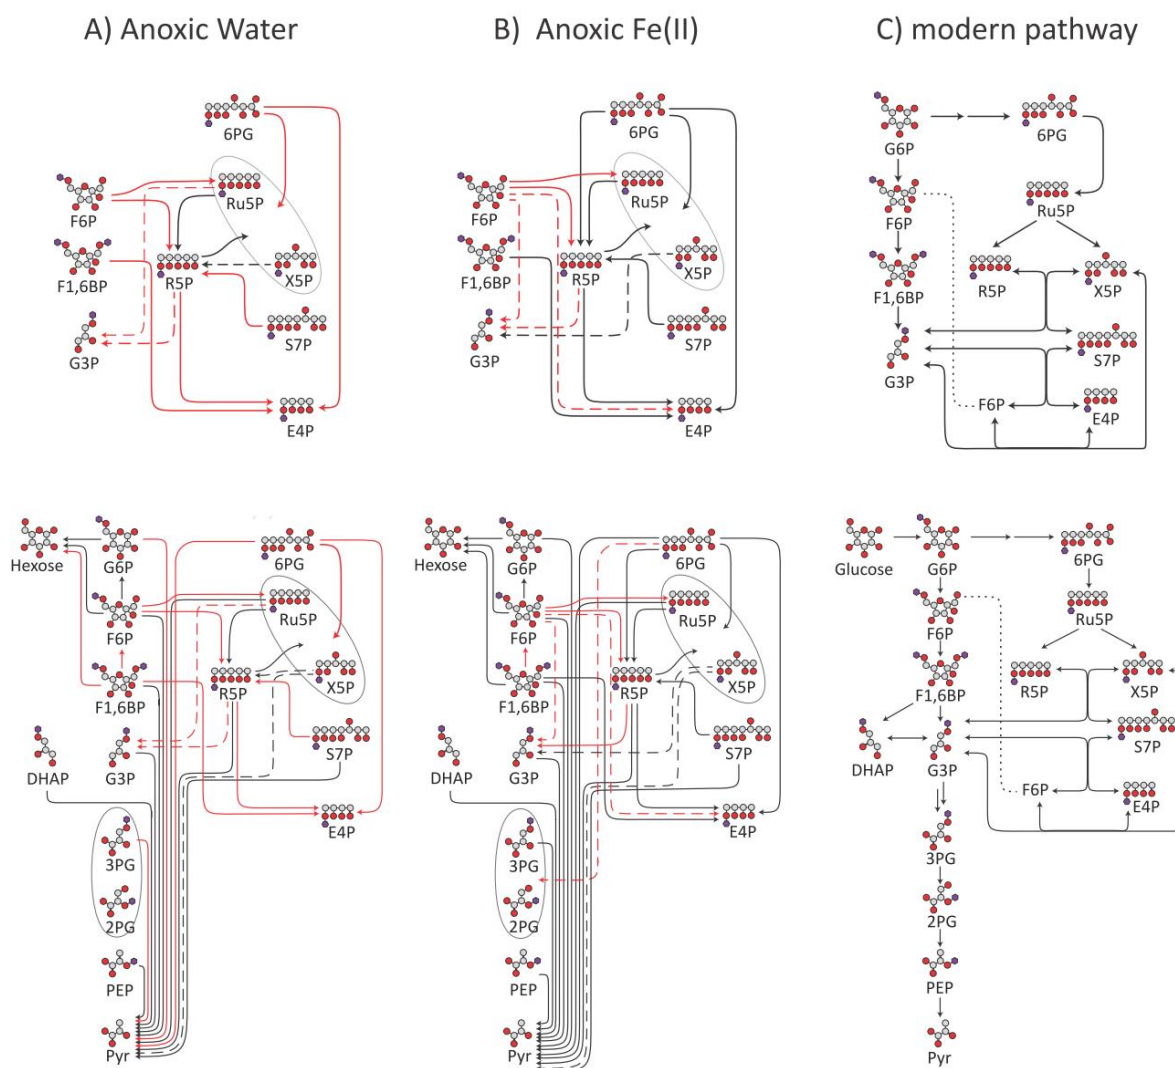

**Supplementary Figure 9: Comparison of Fe(II)- and pH-facilitated non-enzymatic reactivity with the reaction network structure facilitated by a mixture of prebiotically plausible ocean metals [Keller *et al.* (19)]**

Despite this differences most of the reactions (23) of the Archean ocean simulation experiments could be reproduced with Fe(II) alone (see supplementary Figure 8), thereby verifying that Fe(II) is the main contributors to shape the observed non-enzymatic reaction space. Furthermore, we describe three new reactions (F6P-> R5P, F6P ->Ru5P/X5P and F16BP->F6P). Only 4 reactions could not be observed (details see below) in the pure Fe(II) milieu and two reactions could not be followed because their



substrate was no longer commercially available in the required amount and purity (X5P). Also when comparing the water conditions most of the expected reactions were observed (13/15). Additionally the pH series revealed 12 new reactions that are not been observed in unbuffered aqueous solution. Those reactions mainly involve interconversions between sugar phosphate constituents of the PPP. Two reactions were not observed under these conditions and two reactions with X5P as substrate were not tested.

Interestingly, most (4/6) of the reaction that did not appear in the Fe(II) and phosphate containing conditions compared to the full Archean ocean simulation are G3P forming reactions. Possible reasons are that iron/phosphate alone prevent stabilization of this intermediate and prevent higher G3P concentrations from accumulating. Alternatively G3P producing reactions could be dependent on metals other than iron.

A comparison of the rates derived from samples with controlled pH with the unbuffered situation (Fig 3A, boxplots, n.b. = no buffer) in many cases replicates the respective rates at pH 4-5 in case of iron containing conditions and at pH 7 with water. Thus, we can exclude a general strong influence of the phosphate buffer on the observed reactivity. However, some individual reactions could still be affected.
